# Supplementary material for: Proton-conductive coordination polymer glass for solid-state anhydrous proton batteries
Source: PubMed Central journal article supplement (PMC8179665; doi:10.1039/d1sc00392e), 2021-03-12
Supplement: SC-012-D1SC00392E-s001.pdf [file SC-012-D1SC00392E-s001.pdf]

## Supplementary Information for

### Proton-Conductive Coordination Polymer Glass for Solid-State Anhydrous Proton Batteries

Nattapol Ma,<sup>a</sup> Soracha Kosasang,<sup>b</sup> Atsushi Yoshida<sup>a</sup> and Satoshi Horike<sup>\*acde</sup>

<sup>a</sup> Department of Synthetic Chemistry and Biological Chemistry, Graduate School of Engineering, Kyoto University, Katsura, Nishikyo-ku, Kyoto 615-8510, Japan

<sup>b</sup> Department of Chemical and Biomolecular Engineering, School of Energy Science and Engineering, Vidyasirimedhi Institute of Science and Technology, Rayong, 21210, Thailand

<sup>c</sup> AIST-Kyoto University Chemical Energy Materials Open Innovation Laboratory (ChEM-OIL), National Institute of Advanced Industrial Science and Technology (AIST), Yoshida-Honmachi, Sakyo-ku, Kyoto 606-8501, Japan

<sup>d</sup> Institute for Integrated Cell-Material Sciences, Institute for Advanced Study, Kyoto University, Yoshida-Honmachi, Sakyo-ku, Kyoto 606-8501, Japan

<sup>e</sup> Department of Materials Science and Engineering, School of Molecular Science and Engineering, Vidyasirimedhi Institute of Science and Technology, Rayong, 21210, Thailand

\*Email: horike@icems.kyoto-u.ac.jp (S.H)

#### Table of Contents

|                                          |          |
|------------------------------------------|----------|
| 1. Structural determination of <b>1a</b> | S2       |
| 2. Experimental Section                  | S2 – S4  |
| 3. Supplementary figures and table       | S5 – S13 |
| 4. References                            | S14      |

## 1. Structure Determination of 1a

|                           |                                                                                                       |
|---------------------------|-------------------------------------------------------------------------------------------------------|
| Formula                   | $[\text{Zn}_3(\text{H}_2\text{PO}_4)_6(\text{H}_2\text{O})_3] \cdot (\text{C}_6\text{H}_5\text{N}_3)$ |
| MW / g mol <sup>-1</sup>  | 880.02                                                                                                |
| Crystal System            | Triclinic                                                                                             |
| Space Group               | <i>P</i> -1                                                                                           |
| <i>Z</i>                  | 2                                                                                                     |
| <i>a</i> / Å              | 7.47650(10)                                                                                           |
| <i>b</i> / Å              | 14.1513(3)                                                                                            |
| <i>c</i> / Å              | 15.0795(4)                                                                                            |
| $\alpha$ / °              | 115.507(3)                                                                                            |
| $\beta$ / °               | 99.363(2)                                                                                             |
| $\gamma$ / °              | 99.595(2)                                                                                             |
| <i>V</i> / Å <sup>3</sup> | 1369.63 Å <sup>3</sup>                                                                                |
| <i>T</i> / K              | 100                                                                                                   |
| <i>R</i> -factor / %      | 3.11                                                                                                  |
| <i>wR</i> / %             | 8.51                                                                                                  |
| GOF                       | 1.135                                                                                                 |

## 2. Experimental section

**2.1 Synthesis of  $\text{Zn}_3(\text{H}_2\text{PO}_4)_6(\text{H}_2\text{O})_3$ (1,2,3-benzotriazole) (1a).** The ZnO (99.99% trace metals basis), phosphoric acid (85% in H<sub>2</sub>O), and 1,2,3-Benzotriazole (>98.0%, HPLC) were purchased from Sigma Aldrich, Wako pure chemical, and Tokyo Chemical Industry, respectively. All chemicals were used without further purification. Zinc oxide (1281.7 mg, 15.75 mmol), 1,2,3-Benzotriazole (625.4 mg, 5.25 mmol), phosphoric acid (31.5 mmol, 2163  $\mu\text{L}$ ) were added to a 25 mL Teflon jar with three steel-cored 10 mm Teflon balls. The mixer was milled for 60 min at 25 Hz, using Retsch MM 300 mixer mill. The product was evacuated at room temperature for 3.5 h to obtain **1a** in pure phase and kept in an Ar-filled glovebox to prevent adsorption of excess moisture. A single crystal of **1a** was collected by evaporating an identical mixture with excess phosphoric acid in ethanol solvent at 60 °C. **1** is obtained by evacuating **1a** at 80 °C for 12 h. Crystallographic data for the **1a** has been deposited with the Cambridge Crystallographic Data Centre, CCDC, depository number 2044808.

**2.2 Material characterizations.** The single-crystal X-ray diffraction SC-XRD measurement was collected with a Rigaku XtaLab P200 diffractometer and a Dectris Pilatus 200K system at 302 K. The system is equipped with A MicroMax007 HF/VariMax rotating-anode X-ray generator with confocal monochromatized MoK $\alpha$  radiation. The collected data was solved and refined by full-matrix least-squares refinement using the SHELXL 2016/4. Powder X-ray diffraction (PXRD) patterns were collected using a Rigaku MiniFlex with CuK $\alpha$  anode.

Thermalgravimetric analysis (TGA) results were obtained using a Rigaku Thermo plus TG 8121 with a heating rate of 10 °C min<sup>-1</sup> under flowing Ar. Scanning electron microscope (SEM) images were taken using a Hitachi SU5000 instrument after Osmium plasma-chemical vapor deposition for 5 s. CF sheet was hand-pressed to **1m**, followed by quenching at room temperature. Cross-section samples were cut at 77 K. Differential Scanning Calorimetry (DSC) was collected using Hitachi DSC 7020 in an N<sub>2</sub> atmosphere (Pt crucible). Inductively coupled plasma emission spectroscopy (ICP-ES) were measured using Shimadzu ICPE-9000. The sample was digested in nitric acid with yttrium internal standard. <sup>31</sup>P MAS Solid-state NMR (600 MHz) was performed on a JNM-ECZ600R (JEOL RESONANCE Inc.) solid-state NMR spectrometer at 14.1 T at room temperature at 20 kHz (3.2 mm rotor). Variable temperature <sup>1</sup>H MAS Solid-state NMR was measured by the single pulse with a relaxation time of 300 s at an 8 kHz spinning rate from 25 to 100 °C (<sup>1</sup>H Resonance frequency of 600.2 MHz). The spectra were processed with Delta software (JEOL RESONANCE Inc). Dynamic mechanical analysis and viscosity measurement were evaluated via a rotational parallel-plate rheometer (Rheosol-G5000, UBM Co., Ltd.) under N<sub>2</sub> flow, applying oscillatory strain of 1 Hz. IR spectra were obtained with a Thermo Scientific Nicolet Summit FT-IR equipped with a diamond ATR accessory. Note, measurements were performed under ambient atmosphere. Conductivity measurements were performed using impedance spectroscopy technique. Crystalline sample (ca. 50 mg) was pressed at 500 kgf for 2 min using 5 mm die. The pellet was sandwiched between two gold electrodes. The impedance measurements were performed in Ar-filled glovebox using impedance and gain-phase analyzer (Solartron SI 1260 Impedance/Gain-Phase analyzer) over the frequency range 1 Hz - 1 MHz with an input voltage amplitude of 30 mV. Impedance data of glassy state were collected using a BioLogic VSP-300 with a modified stainless coin cell setup and Pt electrode EC Frontier. Sample was filled in liquid state and cool down to room temperature (melt-quenching). Collected data were analyzed using ZView software via equivalent circuit fitting.

**2.3 Proton transport number.** Proton transport number or transference number ( $t_{H^+}$ ) was evaluated via the electromotive force (EMF) measurements to distinguish the contribution of H<sup>+</sup> on overall conductivity. A 2 × 2 cm membrane sheet (Omnipore™ Merck, 10.0 μM) was impregnated with the **1m** at 120 °C then quenching to room temperature. The membrane was then sandwiched between two platinum-coated carbon electrodes (1.5 mg cm<sup>-2</sup>, Ø = 7 mm, Chemix Co. Ltd.), then inserted into a single cell with straight gas flow channels. On one side H<sub>2</sub>/Ar gas (3.99 vol%) was fed uniformly at 100 SCCM. On the other side, variable partial pressures were achieved by mixing H<sub>2</sub>/Ar gas (3.99 vol%) and N<sub>2</sub> (99.99995 vol%). Note, the gas flow was precisely controlled by mass flow controllers (SEC-E40, Horiba, Ltd). The total mass flow of 100 SCCM was maintaining for both sides. The cell was then heated to the target temperature and stabilized for 1 h before evaluation. The EMF between 2 sides was measured under various H<sub>2</sub> partial pressure ( $P_2$ ) on equilibrium for 5 min ( $\ln(P_1/P_2) = 0.22, 0.51, 0.69, 0.92, \text{ and } 1.61$ ). The  $t_{H^+}$  was calculated via the following equation:

$$E = t_{H^+} \frac{RT}{2F} \ln \left( \frac{P_1}{P_2} \right) \quad (1)$$

where,  $E$ ,  $T$ ,  $R$ ,  $F$ ,  $P_1$ , and  $P_2$  represent EMF, temperature, the gas constant, Faraday constant, partial pressure of H<sub>2</sub> at constant, and variable side, respectively.

**2.4 Proton batteries evaluation.** CuFe-TBA (Cu<sup>II</sup>[Fe<sup>III</sup>(CN)<sub>6</sub>]<sub>2/3</sub> · 4H<sub>2</sub>O) and MoO<sub>3</sub> (99.5%, Nacalai) were selected as cathode and anode, respectively.<sup>1-4</sup> CuFe-TBA was prepared by an established method<sup>2,5</sup>. To fabricate the electrode (both anode and cathode), 70 wt% active material, 20 wt% conductive Ketjen black, and 10 wt% polyvinylidene fluoride (PVDF) binder were ground in a mortar with a small amount of N-Methyl-2-pyrrolidone.

The homogeneous slurry was then cast on carbon fiber paper (SGL Carbon) and dried in an oven at 60 °C.<sup>2, 4, 6</sup> The active mass loading for CuFe-TBA is ca. 1.5 mg cm<sup>-1</sup>. An excess amount of MoO<sub>3</sub> was utilized and specific capacity was calculated based on cathode mass. We first confirm the electrochemical performance of CuFe-TBA and MoO<sub>3</sub> in the aqueous system (2 M H<sub>2</sub>SO<sub>4</sub>) via a three-electrode configuration (Fig. S13 A and B). As-prepared CuFe-TBA or MoO<sub>3</sub>, Pt wire, and Ag/AgCl (3 M NaCl) were utilized as a working electrode, a counter electrode, and a reference electrode, respectively. After the half-cell redox reaction was confirmed, a full-cell evaluation (two-electrode) of CuFe-TBA cathode and MoO<sub>3</sub> anode was then conducted in 2 M H<sub>2</sub>SO<sub>4</sub>. Anode and cathode were placed 1 cm apart without using any separator. No distinct performance decay due to the dissolution of the PVDF binder was observed. A full-cell was charged to 1.2 V and discharge to 0 V with at 100 mA g<sup>-1</sup> to 2000 mA g<sup>-1</sup> (Fig. S13 C and D). Note, CuFe-TBA undergoes a charging process before full cell fabrication. The distance between two electrodes was kept ca. 1 cm. The solid-state proton battery was prepared by filling 5 ml cell with **1** (powder). Both electrodes were placed with the 1 cm distance between electrodes. The cell was then heated to the melting point of the **1**. The temperature was held for 30 min to ensure a homogeneous liquid state. The cell was then cool to room temperature to obtain a solid-state proton battery. Both two-electrode and three-electrode evaluations were performed using BioLogic VSP-300 with galvanostatic charge-discharge (GCD chronopotentiometry). Measurement temperature of the solid-state battery was controlled using a Sibata DBH-1000 heater. Before each measurement, the target temperature was held constate for at least 1 h. No electrolyte decomposition was found within the operating range of full-cell proton batteries. As a reference, pelletized **1** with a thickness of 1 mm (17 mm diameter) was sandwiched between similar cathode and anode. A CR2032 coin cell was fabricated and tested at 1 mA g<sup>-1</sup>.

### 3. Supplementary Figures

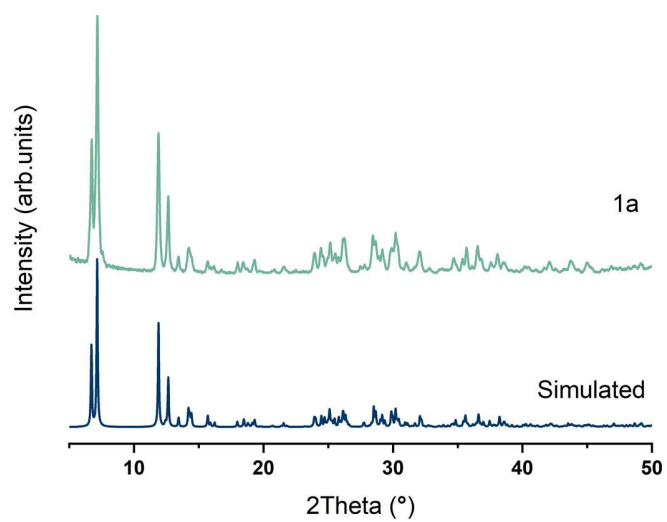

**Fig. S1** PXRD patterns of **1a** (green) and simulated PXRD patterns (blue).

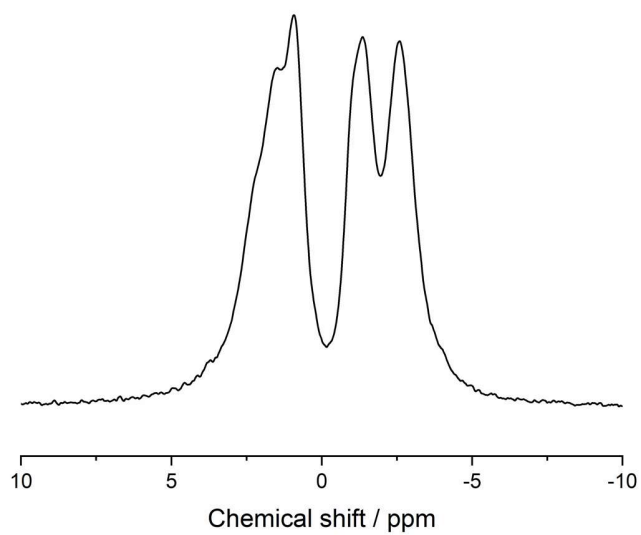

**Fig. S2** <sup>31</sup>P Magic-angle spinning (MAS) NMR spectra of **1a** with a rotation rate of 20 kHz.

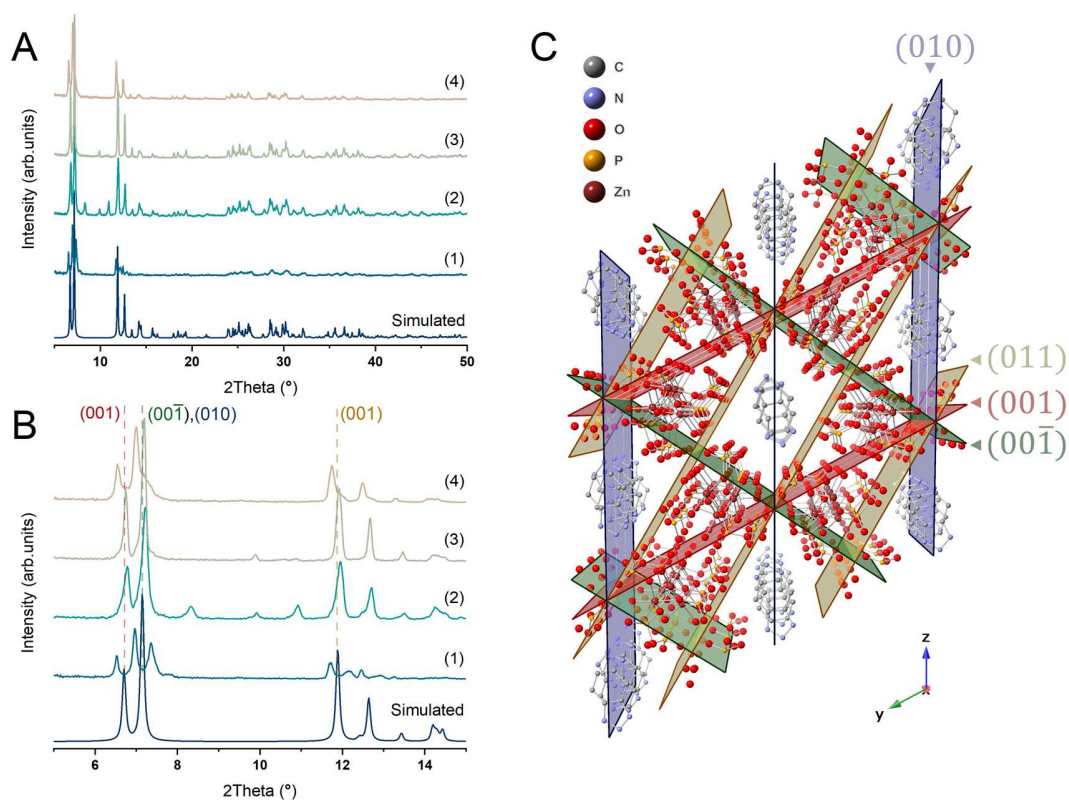

**Fig. S3** PXRD pattern (A) between 5 ° to 50 ° and (B) between 5 ° to 15 °, represent following condition: Milling product from the stoichiometric ratio of Zinc oxide, 1,2,3-Benzotriazole, and phosphoric acid before vacuum drying (1). After 12 h of vacuum drying at room temperature (2), then left in humid air for 3h (3) and 12 h (4).

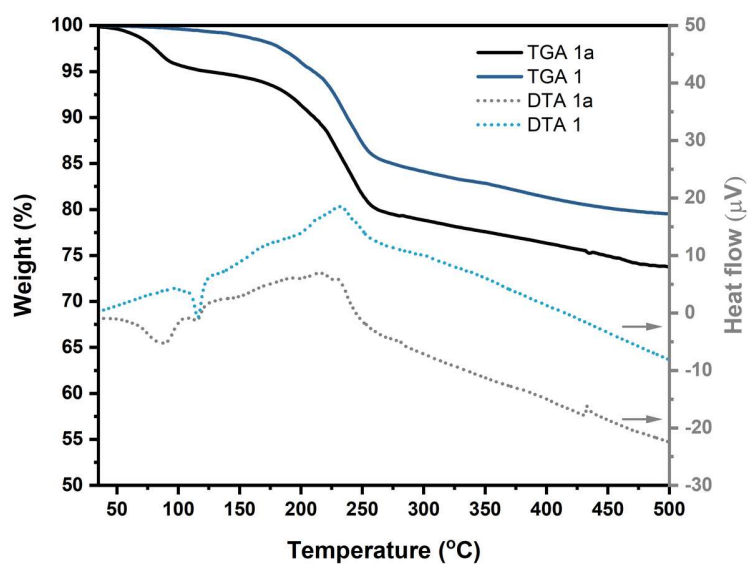

**Fig. S4** TGA and DTA profile of **1a** and **1** from 40 to 500 °C (10 °C min<sup>-1</sup>).

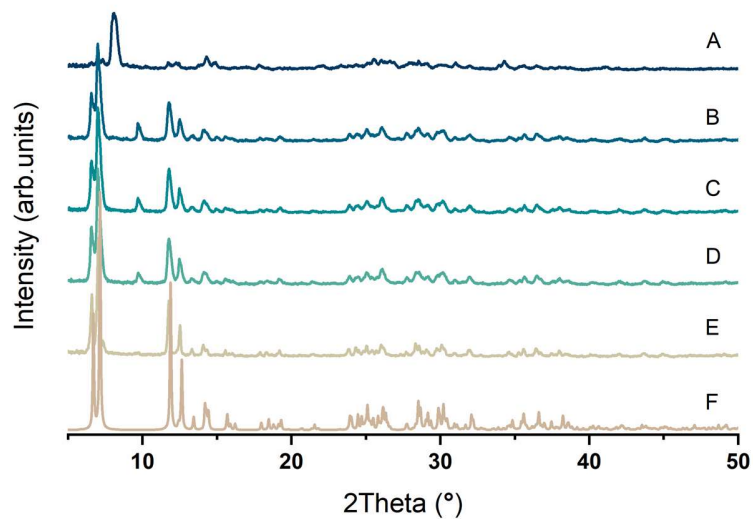

**Fig. S5** PXRD of **1** after humid air exposure for (A) 0 min, (B) 15min, (C) 30 min, (D) 90 min, (E) 4 h, as well as (F) the simulated pattern of **1a**.

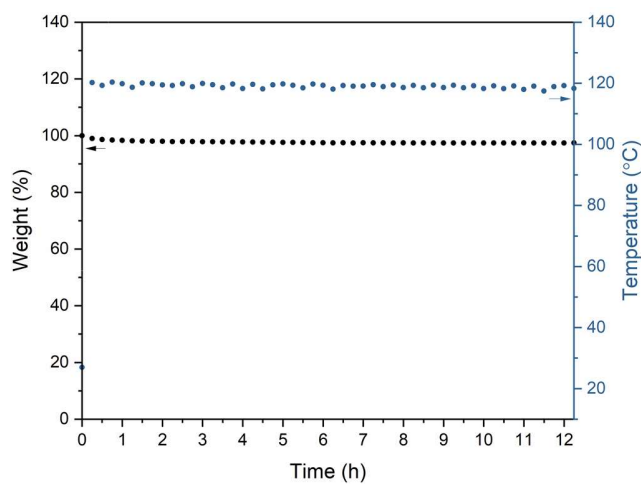

**Fig. S6** Constant temperature TGA of **1m** at 120 °C.

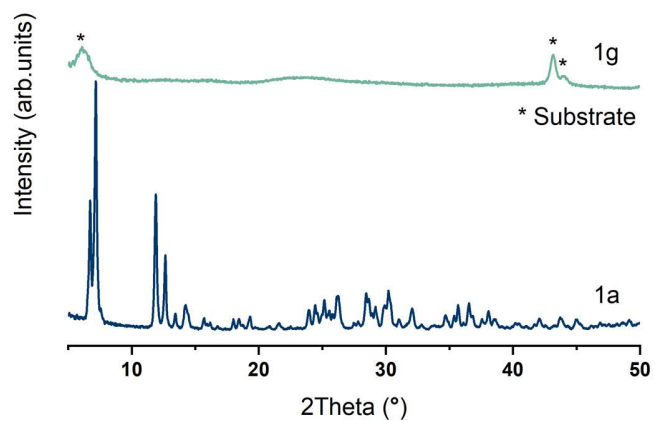

**Fig. S7** PXRD patterns of **1g** (green) and **1a** (blue). Ar cell background peaks represent as (\*).

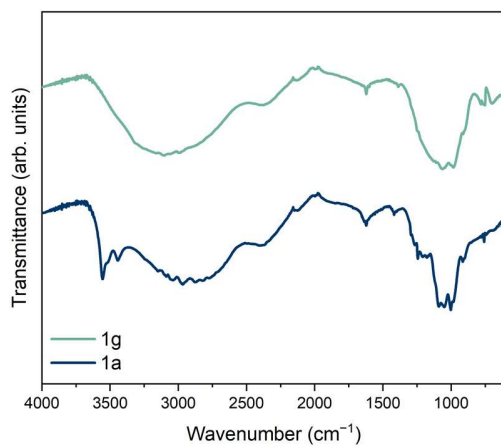

**Fig. S8** IR spectra of **1g** (green) and **1** (blue).



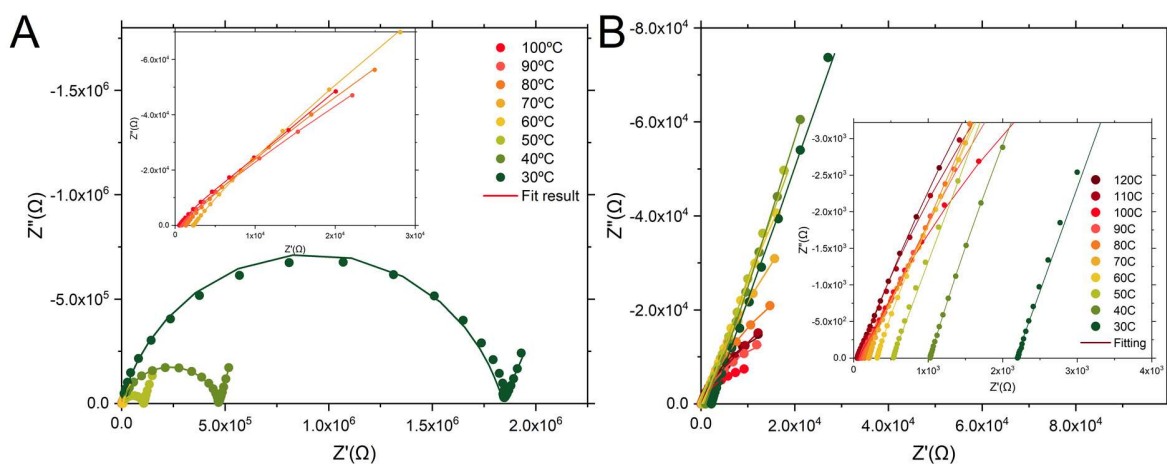

**Fig. S9** Nyquist plots of (A) **1** from 30 to 100 °C and (B) **1g** from 30 to 120 °C. Two types of equivalent circuit models were applied to fit the impedance in 2 different temperature ranges. Between 30 to 50 °C, **1** exhibits two series (RQ) impedance response corresponding to bulk resistance and electrode-electrolyte interface, respectively. Above 50 °C, R(RQ) impedance model was utilized. Note, R and Q represent resistor and constant phase element.<sup>7, 8</sup>

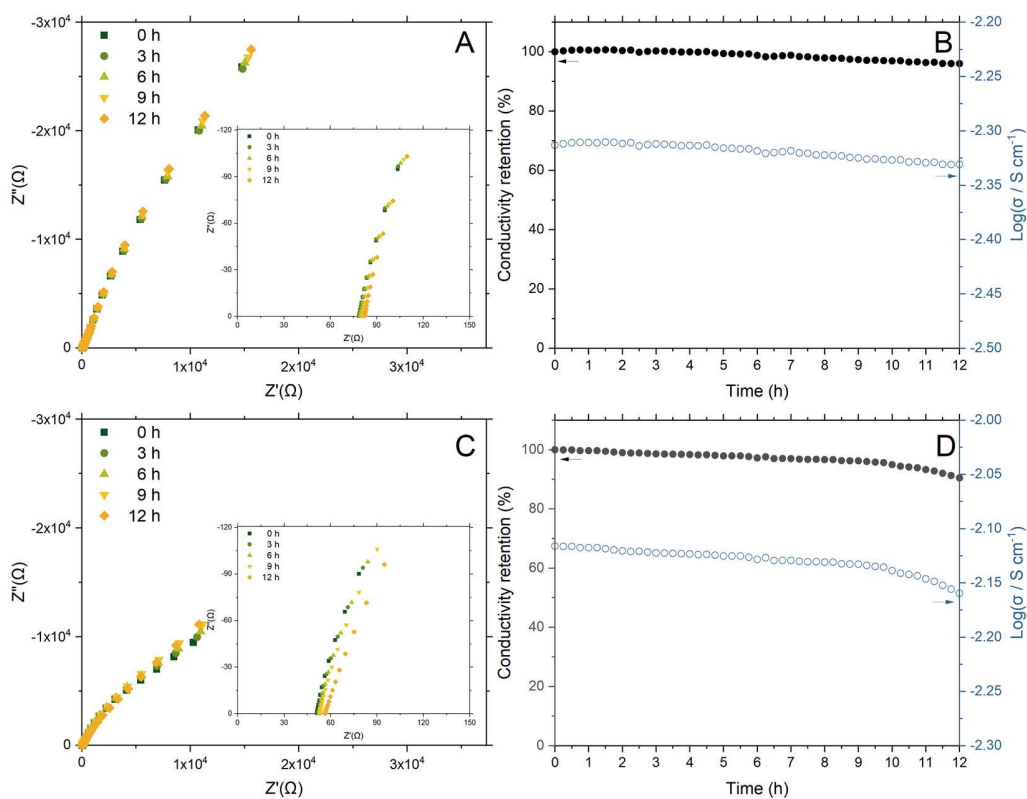

**Fig. S10** Nyquist plots and Long-term proton conductivity retention of **1g** for 12 h at 100 °C (A) and (B) as well as 120 °C (C) and (D).

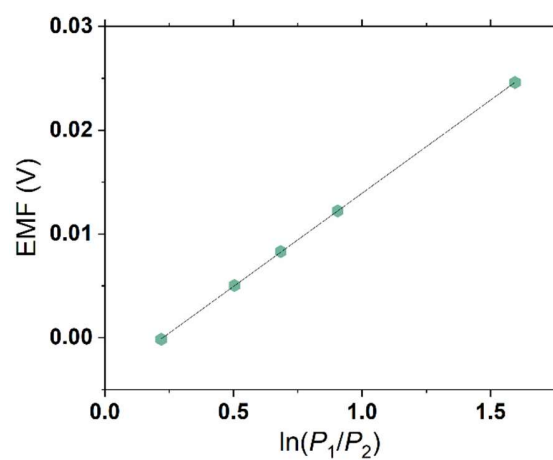

**Fig. S11** Electromotive force (EMF) measurement of **1g** at 120 °C with experimental data fitting line.

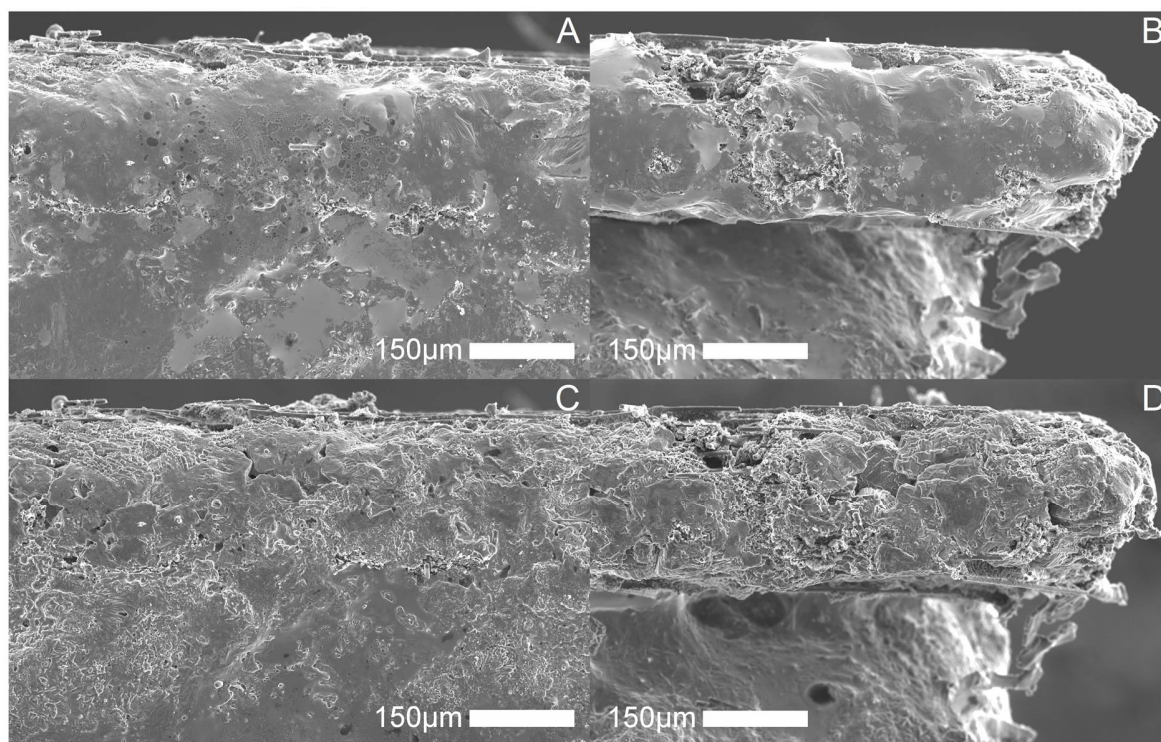

**Fig. S12** Cross-section SEM images (x150 magnification) of the electrode-electrolyte interface of the as-prepared sample at (A) mid-section and (B) edge. The as-prepared sample was then left in the humid air for 4 h and keep in the Ar-filled glove box for 20 h to demonstrate the recrystallization of **1g**. SEM images recrystallized sample at (C) mid-section and (D) edge.

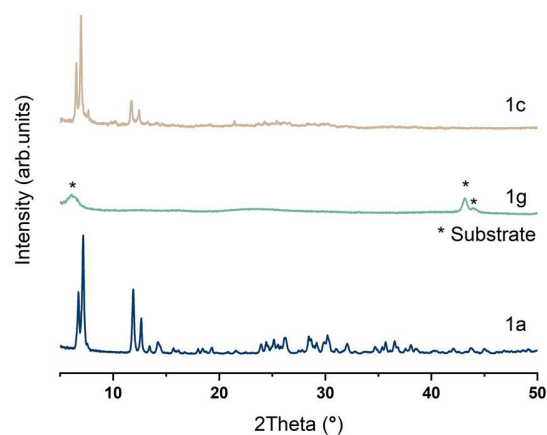

**Fig. S13** PXRD patterns of the recrystallized sample (beige), **1g** (green), and **1a** (blue). Ar cell background peaks represent as (\*).

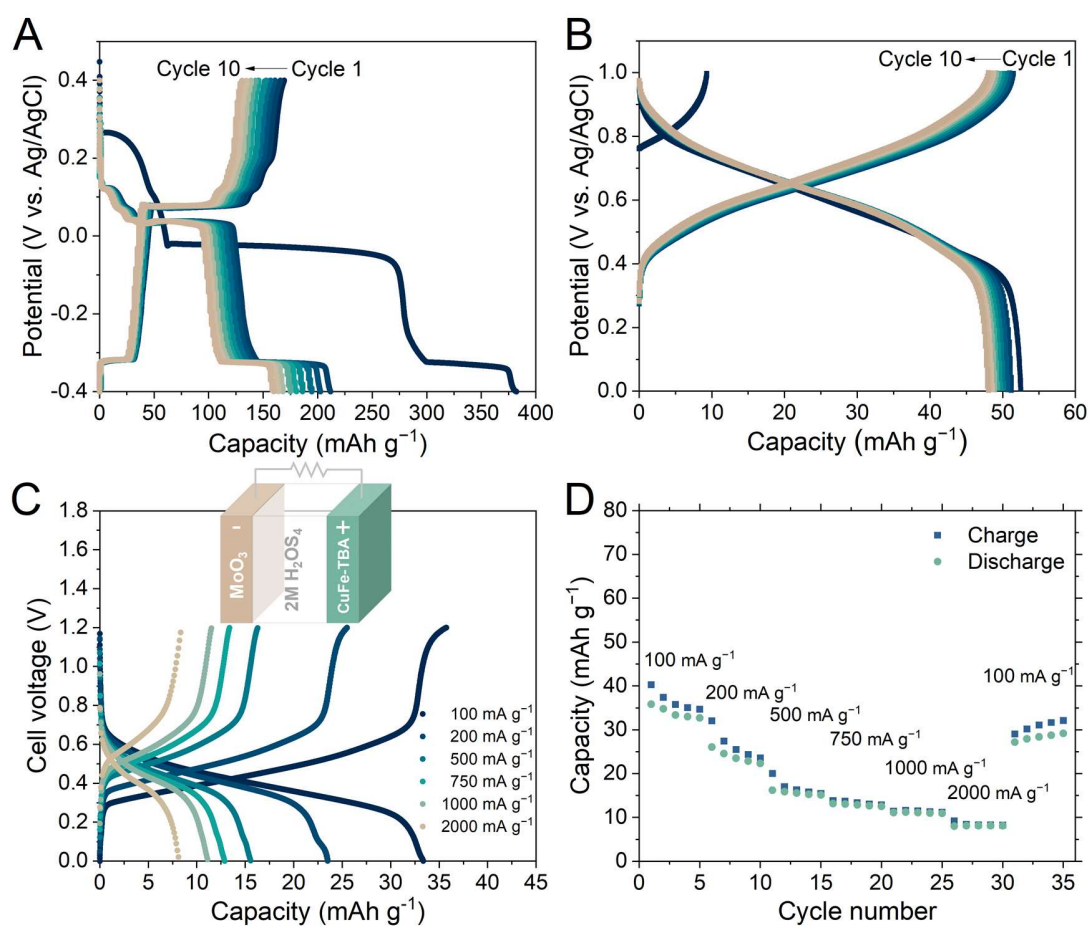

**Fig. S14** GCD profiles at various specific current in 2 M  $\text{H}_2\text{SO}_4$  of (A)  $\text{MoO}_3$ , (B)  $\text{CuFe-TBA}$ , and (C) Full cell batteries (inset demonstrates cell configuration). (D) Full cell capacity at various applied current.

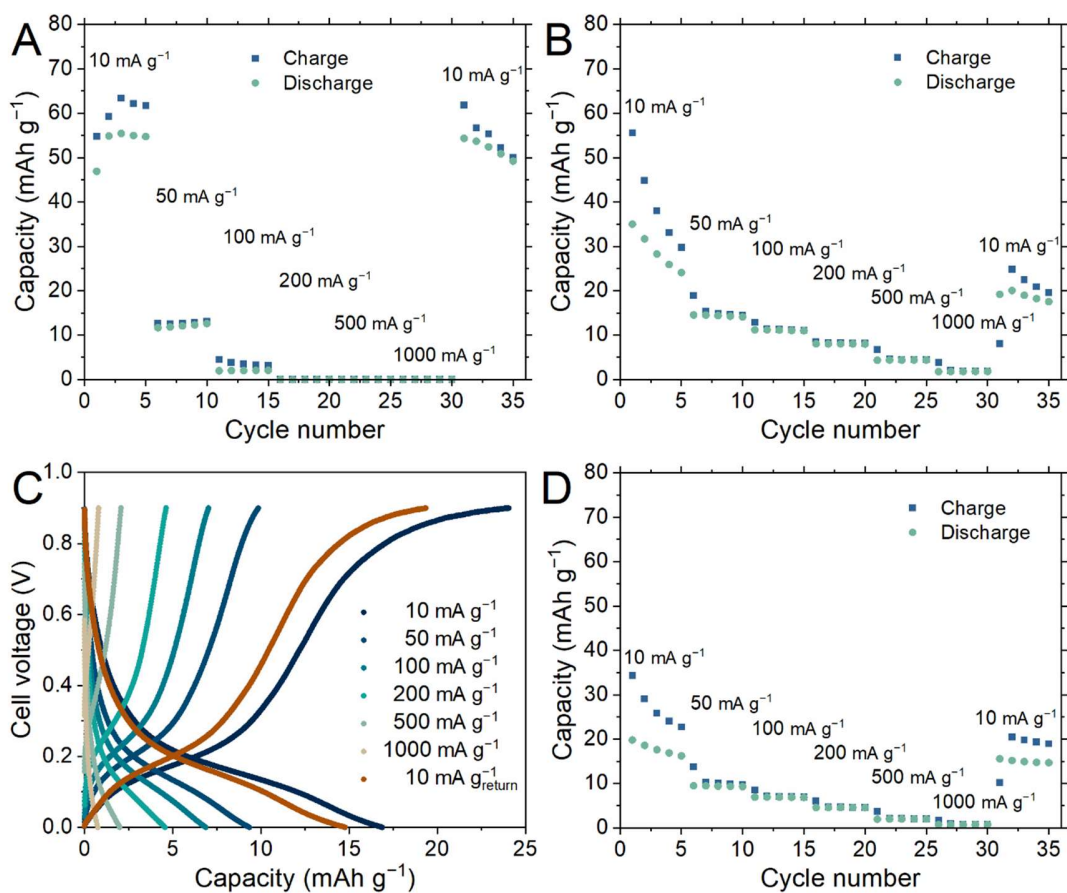

**Fig. S15** Rate capacity utilizing **1g** as a solid-state electrolyte at (A) 25 °C and (B) 100 °C. Full cell charge-discharge profiles (C) and rate capacity (D) at 110 °C.

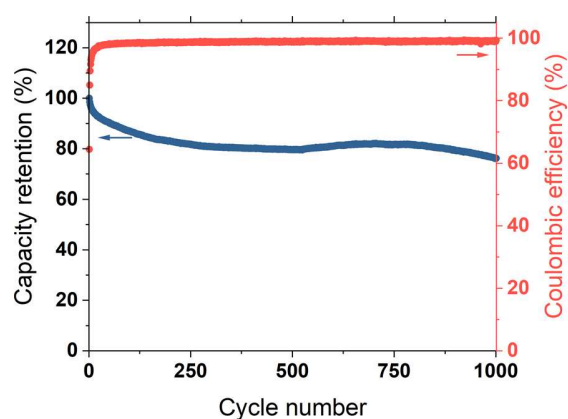

**Fig. S16** Stability of full cell battery utilizing solid-state **1g** at 110 °C (100 mA g<sup>-1</sup>).

**Table 1.** Full-cell proton battery of representative systems.

| Anode<br>Cathode                            | Electrolyte<br>(state)                                                                                                                                    | Temperature range<br>(ionic conductivity)                                                     | Rate performance*                                                                                                                                                                     | Estimated<br>Discharge<br>Voltage | Cycling<br>stability                  | Ref.         |
|---------------------------------------------|-----------------------------------------------------------------------------------------------------------------------------------------------------------|-----------------------------------------------------------------------------------------------|---------------------------------------------------------------------------------------------------------------------------------------------------------------------------------------|-----------------------------------|---------------------------------------|--------------|
| PEDOT-AQ<br>PEDOT-BQ                        | 2-fluoropyridinium<br>triflate-2-fluoropyridine<br>(ionic liquid)                                                                                         | 22 °C (n/a)                                                                                   | 103 and 25 mAh g <sup>-1</sup><br>(70 mA g <sup>-1</sup> and 120 A<br>g <sup>-1</sup> )                                                                                               | 0.55 V                            | 44.4% after<br>125 cycles             | 9            |
| WO <sub>3</sub><br>CuFe-TBA                 | Aqueous 2.0 M H <sub>2</sub> SO <sub>4</sub><br>(liquid)                                                                                                  | 25 °C (n/a)                                                                                   | 50 mAh g <sup>-1</sup><br>(0.5 A g <sup>-1</sup> , -70 °C)                                                                                                                            | 1.0 V                             | 74% after<br>1000 cycles              | 2            |
| MoO <sub>3</sub><br>MnO <sub>2</sub> @GF    | Aqueous 2 M H <sub>2</sub> SO <sub>4</sub><br>+ 2 M MnSO <sub>4</sub><br>(solid below -40 °C)                                                             | -78 °C to 25 °C<br>(2.66 mS cm <sup>-1</sup> at -70 °C<br>139.9 mS cm <sup>-1</sup> at 25 °C) | ca. 119 mAh g <sup>-1</sup><br>(0.5 A g <sup>-1</sup> , -70 °C)                                                                                                                       | 1.5 and 1.14 V                    | 100% after<br>100 cycles at<br>-70 °C | 10           |
| pEP(NQ)E<br>pEP(QH <sub>2</sub> )E          | Aqueous 3.3 M (-24 °C)<br>and 0.5 M (22 °C) H <sub>2</sub> SO <sub>4</sub><br>(liquid)                                                                    | -24 °C to 22 °C<br>(n/a)                                                                      | 60 and 40 mAh g <sup>-1</sup><br>(1.1 and 3 A g <sup>-1</sup> , -24 °C)                                                                                                               | 0.3 V (-24 °C)<br>0.4 V (22 °C)   | 98% after<br>500 cycles at<br>-24 °C  | 11           |
| MoO <sub>3</sub><br>CuFe-TBA                | Aqueous 9.5 M H <sub>3</sub> PO <sub>4</sub><br>(liquid)                                                                                                  | -88 °C to 25 °C<br>(0.11 S cm <sup>-1</sup> at 25 °C)                                         | 28 and 49 mAh g <sup>-1</sup><br>(25 mA g <sup>-1</sup> , -78 and<br>25 °C)                                                                                                           | 1.0 V                             | 100% after<br>450 cycles at<br>-78 °C | 12           |
| MoO <sub>3</sub><br>CuFe-TBA                | 1.0 M H <sub>3</sub> PO <sub>4</sub> in MeCN<br>(liquid)                                                                                                  | 25 °C<br>(0.50 mS cm <sup>-1</sup> )                                                          | 48 mAh g <sup>-1</sup><br>(100 mA g <sup>-1</sup> )                                                                                                                                   | 0.6 V                             | ca. 48% after<br>100 cycles           | 13           |
| MoO <sub>3</sub><br>ZnFe-TBA                | 1.0 M H <sub>3</sub> PO <sub>4</sub> in MeCN<br>(liquid)                                                                                                  | 25 °C<br>(0.50 mS cm <sup>-1</sup> )                                                          | 48 mAh g <sup>-1</sup><br>(100 mA g <sup>-1</sup> )                                                                                                                                   | 0.7 V                             | ca. 79% after<br>100 cycles           | 13           |
| MoO <sub>3</sub><br>CuFe-TBA<br>(This work) | [Zn <sub>3</sub> (H <sub>2</sub> PO <sub>4</sub> ) <sub>6</sub> (H <sub>2</sub> O) <sub>3</sub> ][1,2,3-<br>benzotriazole] glass ( <b>1g</b> )<br>(solid) | 30 °C to 110 °C<br>(0.33 mS cm <sup>-1</sup> at 30 °C<br>6.5 mS cm <sup>-1</sup> at 110 °C)   | 55 mAh g <sup>-1</sup><br>(10 mA g <sup>-1</sup> , 30 °C)<br>28 mAh g <sup>-1</sup><br>(10 mA g <sup>-1</sup> , 100 °C)<br>18 mAh g <sup>-1</sup><br>(10 mA g <sup>-1</sup> , 110 °C) | 0.4 V (25 °C)<br>0.2 V (110 °C)   | 76% after<br>1000 cycles<br>At 110 °C | This<br>work |

The abbreviations of PEDOT-AQ, PEDOT-BQ, WO<sub>3</sub>, CuFe-TBA, MoO<sub>3</sub>, MnO<sub>2</sub>@GF, NiFe-TBA, ZnFe-TBA represent Poly(3,4-ethylenedioxythiophene) functionalized with anthraquinone, Poly(3,4-ethylenedioxythiophene) functionalized with benzoquinone, Tungsten trioxide, Copper hexacyanoferrate (Turnbull's blue analogs), Molybdenum trioxide, Manganese oxide on graphite felt, Nickel hexacyanoferrate (Turnbull's blue analogs), Zinc hexacyanoferrate (Turnbull's blue analogs), respectively.

\*Rate performance was based on the mass of the limiting electrode.

## References

1. X. Wang, Y. Xie, K. Tang, C. Wang and C. Yan, *Angew. Chem. Int. Ed.*, 2018, **57**, 11569-11573.
2. X. Wu, J. J. Hong, W. Shin, L. Ma, T. Liu, X. Bi, Y. Yuan, Y. Qi, T. W. Surta, W. Huang, J. Neufeind, T. Wu, P. A. Greaney, J. Lu and X. Ji, *Nat. Energy*, 2019, **4**, 123-130.
3. X. Ji, *Energy Environ. Sci.*, 2019, **12**, 3203-3224.
4. X. Wu, S. Qiu, Y. Xu, L. Ma, X. Bi, Y. Yuan, T. Wu, R. Shahbazian-Yassar, J. Lu and X. Ji, *ACS Appl. Mater. Interfaces*, 2020, **12**, 9201-9208.
5. S. S. Kaye and J. R. Long, *J. Am. Chem. Soc.*, 2005, **127**, 6506-6507.
6. C. D. Wessells, R. A. Huggins and Y. Cui, *Nat. Commun.*, 2011, **2**, 550.
7. J. R. M. E. Barsoukov, *Impedance Spectroscopy Theory, Experiment, and Applications*, John Wiley & Sons, NJ, USA, 2nd edn., 2005.
8. T. Ogawa, K. Takahashi, S. S. Nagarkar, K. Ohara, Y.-l. Hong, Y. Nishiyama and S. Horike, *Chem. Sci.*, 2020, **11**, 5175-5181.
9. R. Emanuelsson, M. Sterby, M. Strømme and M. Sjödin, *J. Am. Chem. Soc.*, 2017, **139**, 4828-4834.
10. L. Yan, J. Huang, Z. Guo, X. Dong, Z. Wang and Y. Wang, *ACS Energy Lett.*, 2020, **5**, 685-691.
11. C. Strietzel, M. Sterby, H. Huang, M. Strømme, R. Emanuelsson and M. Sjödin, *Angew. Chem. Int. Ed.*, 2020, **59**, 9631-9638.
12. H. Jiang, W. Shin, L. Ma, J. J. Hong, Z. Wei, Y. Liu, S. Zhang, X. Wu, Y. Xu, Q. Guo, M. A. Subramanian, W. F. Stickle, T. Wu, J. Lu and X. Ji, *Adv. Energy Mater.*, 2020, **10**, 2000968.
13. Y. Xu, X. Wu, H. Jiang, L. Tang, K. Y. Koga, C. Fang, J. Lu and X. Ji, *Angew. Chem. Int. Ed.*, 2020, **59**, 22007-22011.
